# Supplementary material for: Comparative genomic analysis of the multispecies probiotic-marketed product VSL#3
Source: PLoS One. 2018 Feb 16;13(2):e0192452. doi: 10.1371/journal.pone.0192452 (PMC5815585; doi:10.1371/journal.pone.0192452)
Supplement: S8 Table — (XLSX) [file pone.0192452.s009.xlsx]

## Sheet: S8 Supplementary Table
Lactobacillus helveticus BD08	5
locus_tag	start	stop	direction	product	Prokka_locus_tag	translation
BD08_00277	1411	1563	+	LPXTG cell wall anchor domain protein	Prokka_00277	MSNSSSVTEDKTNTLPQTGEKDSNNSVMGLIALSFASLLSIFGLNRKKKN
BD08_01245	3895	4041	+	LPXTG cell wall anchor domain protein	Prokka_01245	MFIKNGQVHYYSLPQTGEKQNDLAAILGASAIAISMIGLAGVKKRRNN
BD08_00911	19200	20333	+	LPXTG cell wall anchor domain protein	Prokka_00911	MVLIQKLLNITYTPNKQTTNIVYKDKDGQTIKTDKVDGKTDETIPVDPTKDVPAGWKIIPDQKIPETVKVTQDGVPTVVVKIEHKTITVTPETPEGDIPTGKVPGDPSKTYPAMESITKTPTRTITVIKPDGSKLEIKQTVEFTRTATFDEVTGTVTYSDWKFAKSTAKGGKSQWDAYTPQAISGYTMHIEQKVGDKTTTISSIAAADVTEATGNVTITVTYVPITPGGGEGGGDDIIPGKPSKPDDHKPGVPDKTPDKPIIENPDDTEIGTTPKDQDLESGPAAIKGYKETNAPLHEDMNNAAPVRGNNSISPKGADTYAETNAPTKAASVESEEKGGKHELPQTGEKENTAGIFGIIAMVLGFFGLADRKKKKDE
BD08_01415	8815	9561	-	hypothetical protein	Prokka_01415	MKNIPATKVTEEDITKTVTYASNGHIIPVDSNDQPIPGAEHPIFPTDPDAPTKVIDGRILVVPGYKPEQGKPNDPVAPAKNPSQNVNVPYIKESTQPPAPDNPTPQPTPTPEPKKPETPKTPEKDNTPEPDEPDVPTPRRHHKNKKHTSASKPMNNWSNNRSPYGENSNYKPIGETAPGNGESILPNGEVVDHNGNVVGYVDANSKIHHTLPQTGESNNENVAAAVLGGTAVALGLIGLTGVKRRHTN
BD08_01367	12157	13536	-	hypothetical protein	Prokka_01367	MKKLLVSVLLLLMLTWVKGVKTVQAAVSDNFTKIIFNDGKSEKVESGQLVHVNVELASVQKDKLKSDVPLTITWSGSDKVQAKGINKTKDFIVKDENDSEQKVGTYTVEADRVLIKFNDNIEKYNHLVGRLAFNLLVHNSTDDKQEIPVHAGEIKKAITVDPSDKSSLLAEGTGKLNQRQDSISWEIKVNPDEKEFLGPIKILNELPEGLAFHKSTVGIEADDVFVKLGKEEVKFDQNKLLINLNNKGRSHRTFTLKYKTKILDQNATTKINKIQLEYQLKDDDKRKSSVYEGRILNDFDATFVGIRNESDDEMVRRKTLEKAERDRGLSLLFSRLLKLLDSEKEDQSKNNKDIEPVKILSKTAEPASTFEAAKEVNPKGLSGFDKKEQSSTNNAHTKI…
Lactobacillus paracasei BP07	16
locus_tag	start	stop	direction	product	Prokka_locus_tag	translation
BP071_01124	159021	161645	-	hypothetical protein	Prokka_01138	MSDAKAKASDHASSDAKASASDAAKAASDAAESAKKASDASSDTTGIASNYPSDAGIASDAAKASDAASDAKSQAGLASDAAKAASDAAAKSDASGAASAGKQASDAAAKAASDAKVASDALSDAKAKASDHASSNANISASDAAKAASDAAESAKKASDASSETTGIASNYPSDAGIASDAAKASDAASDAKSQAGLASDAAKTASDAAAKSDASGAASAGKQASDAASKAASDAKVASDALSDAKAKASDIASGKAASDAKVSASDAAKAASDAAESAKKASDASSETTGIASNYPSDAGIASDAAKASNAASDAKSQAGLASDAAKAASDAAAKSDASGAASAGKQASDAASKAASDAKVASDALSDAKAKASDIASGKVASDAKVSASDAAKAAS…
BP071_02691	2312	2692	-	Collagen adhesin	Prokka_02739	MANGQQVASKKVSASDNWQYSFDNLAAYANGQKITYTVTEDAVAGYTSTVDGYNITNTHNPTTPKEPQVPNNGNKVTPKDFTQGKMYDKTSRLPQTGDGSSMGMMLIGLVTLLLSLGLVVISRFTI
BP071_01355	109808	110812	+	putative outer membrane protein, spaA	Prokka_01370	MKKTIAKKVLTLTSTILMTLLMVLGFNGTRVQSDTNGTTTQNVVLTKYGFEKDVTAIDRATDQIWTGDGAKPLQGVDFTIYNVTANYWASPKDYKGSFDSTSVVATGTTNDEGQLTQALPTQSTDASGKTRAAVYLFHETNPRAGYNTSADFWLTLPAKAAADGNVYVYPKNVQKTTYERTFVKKDAETKEVLEGAGFKISNSDGKFLKLTDKDGQSVSIGEGFIDVLANNYRLTWVAESDATVFTSDKSGKFGLNGFADNTTTYTAVETNVPDGYDAAANTDFKADNSSSDILDAPSGILPHTGGTGTVIFAILGVALIAFGAVAYRKRRNGF
BP071_01569	143458	144729	-	Internalin-J	Prokka_01586	MQAFSNEKSQHKMYKAGTLWVAALIGVGICVGGSQIQSVTASTSHIHSVVTNATGTTPTNQATVLKQQETGMNDQIIAGHQTGQYSTKGVTNAGDDTTSAVPDTDVYQNRSLPITGNAVVVRCVDIEGNMLAPDKVITGKVGDPYTMTAPAFDYYENPQLATDSAPANGTFSNDVQTVTFVYTKTPIPRGSVNVKFVDVDGKRLASDKILTGQAGDPYEARPIDMTNYQFARLATGSAPEDGSFTDGTQTVTFIYTKNPVAQGTVDVKYVDDNGKQIAPDKILTGHVGDPYAVTPTMIANYHYLRLASGSIAENGAFATGSLTVTFVYAKQATPVTPSTPVTPSTPTTPSTQVLPSMSDTPTESAPLSDNDTAPIEVIIPTKQISRYLPNTGDNQRTSL…
BP071_01740	61954	67617	-	Putative surface protein bspA-like protein	Prokka_01758	MILKLDSKRIQLARQAEQTVHVRFRMYKAKKRWLIAGAALLFIPAFFQPGHEVKADTSLPQTQVTATSQAAEPATSQSAVTSDQATTSSNAVNATNSGEAVKASSAASAASSQTSSSSAAQTLTSQAAAPEQTTDASQVASATSAQVVSGSGAAQSAAAADQAATQAATASETAASSAANSQASSAQQSASSQAQPVATAAAQPTVTANTTTTDATVDGLTYSFDETTKTATVTGHDSGATLTDINIGPTVSYNGQAYTVTAIQDVAFFNLSNLTSLHVASTVTTIGASAFAYSKFTGGITVDNAAVIGKEAFAGVNASAITLNGAGNIGESSFAYATITGVASVAGPATIGQNAFYGLKAESLTLDDEVANIGEAAFAYETINDTINVAGSATIGKNA…
BP071_01457	50204	55912	-	PII-type proteinase	Prokka_01474	MQRKKKGLSILLAGTVALGALAVLPVGEIQAKAAISQQTKGSSLANTVKAATAKQAATDTTAATTNQAIATQLAAKGIDYNKLNKVQQQDIYVDVIVQMSAAPASENGTLRTDYSSTAEIQQETNKVIAAQASVKAAVEQVTQQTAGESYGYVVNGFSTKVRVVDIPKLKQIAGVKTVTLAKVYYPTDAKANSMANVQAVWSNYKYKGEGTVVSVIDTGIDPTHKDMRLSDDKDVKLTKSDVERFTDTAKHGRYFTSKVPYGFNYADNNDTITDDTVDEQHGMHVAGIIGANGTGDDPTKSVVGVAPEAQLLAMKVFTNSDTSATTGSATLVSAIEDSAKIGADVLNMSLGSDSGNQTLEDPEIAAVQNANESGTAAVISAGNSGTSGSATEGVNKDYY…
BP071_01354	109081	109797	+	putative outer membrane protein, spaB	Prokka_01369	MTKSFRPLVILTFCLALLVSLATTTLQQTQAATVPTTVDVVLHKLLFKDTLPTQQANNGTTKPDFSQADVPLNGVTFTVYDVTADFWQLVSKNGGAIEAAQTTLSQDSYQPASSSLIAQVVTAGQGEAYFGDLPLRQGQHAAVYLFKETAAPKNIEASQNLVVVMSSNLQHGNQSRIDLFPKNKMVSRHTDAPKKVPKKTRQLLPQTGDTVAAWLSTLGLIIFATVLAFNMKKQKIDN
BP071_00568	14780	15139	+	hypothetical protein	Prokka_00576	MTRSIWRFLISLIIVFGVLGEGIMAAHQVRAATSIGEVVVIDDRPKPDKDHNAPGTEVSKPKEEPSVPPRQQVDRLPQTSEGGQTWYPLIGFALLMMSSLRLQLRFKRKDRGDDDENRD
BP071_02542	28906	31911	-	putative outer membrane protein, spaF	Prokka_02567	MPKKLIHIVMLAMLMLTQVGSAVVPVADNGETNITEHDRAAPKSDPSSHQNDASGQAAISQDTIESDKKQTSAAMSSSENQTVKTKMPELTNRLDRQDVVLDDGGQWTAAVGQHVVTYTYDMQQAEIKVKLKLVKPWSENRTQKVVVTPFKDIVSQPAHTNGEINHVFENNNWAEYEYEMTKKLSSEEQKQKSFKLSLDGFNGTDHVVSLNLDLKLPGPIVNDHVSEPGTDSLDAHSLILPRAALGETKIQVTKADGSDFPIGSAQIYRKPNGSSRSKYGSQTAMKENVSTDYVPSSSATAVIFKDVITQEDGLSNVLDAKLKVDINHVGSASDLNGRHFEIGAYVEMTNIHVRRVEWAPTPTDVGIDFSNNFFSGMSFANVLHYDWRVVFYEKETGKR…
BP071_00565	10716	11093	+	hypothetical protein	Prokka_00573	MRRNKPSFWIMLLMTMSLMVGVGAKAQQVQADTSVAQVELVGELPSTNPDPNPTPTPDPTPKPEPVDHQTTDQHGQATPLTHTGYLPQTGNAVQLWYVVIGVELLIIVILGIVLLRGRSRQGGKK
BP071_02458	34999	36795	+	putative outer membrane protein	Prokka_02479	MQKRRHSQKRASVFLLITLLLSVLVALIPPLISKPISVGAGQNIAVTGFGSQDATITDTTGKDFTHAPNLSMYSVYTLTYHWRIPDEVVVKAGDTATVSLPATVVSRADVDFAVVDPTTGATIGHFFSKAGSSTGILTFTDFFSHSTVGRQGELQFMVSGRYDDSGHQRPGWYIYKAGWVVNPPTGATPEEKAQYVDDLGRPKIFQWEITINPNMEHVDNVVLTDTLGPGQHFDTSRGLVVHTGTYDDNWFHATGTITPSYQVNGNQVKISLGTITTAIQIDLWTNPTSASFETTDSWTNSVVASGKQGGTGAPAQANGTITWRNGGSGTGQVGQVTLIKQDQKTHQQALAGAVFSLYRADGTLVHDDLTTDTKGKLTFTQLLVGQYYFVETKAPKGYK…
BP071_01353	106359	109088	+	putative outer membrane protein, spaC	Prokka_01368	MTKMTAKVARTGHLFAVLLILMSMLTGLVTSGSSVVTAAANIRPTYQTDANGTYSTNSWQVTGQQNVINQRGGDQVSGWDNNTIWNGDATDTTNSYLKFGDPNNPDYQIRKYAKETNTPGLYDVYLNVKGNTQQNVKPVDIVLVVDMSGSMESKNNGGTDRAGAVRTGVKNFLTSIQNAGLGDYVNVGLIGFSSPGYIGGGNKTTGPGYIRVGLGKAGNTSQQQAINSALSPTFNGGTYTQIGLRQGSAMLNADTSGNKKMMILLTDGVPTFSDKVKNSVVENGTLYGTNFGTTRDEPGYTAELKNPYIDSSGDYIYDTWPATLGEAKKAKDSGNVVHALGIQLAGDDGYWSEGYMSDEDVRQNMELIPTSPDLYEDADSADAVEAYLNNQAKDIVKNF…
BP071_02238	1370	5179	+	putative outer membrane protein	Prokka_02259	MKAVRRTSVFTALIAIFVQLVIPASMAIAASMTNIKVADWRNTWHLHLFNGLHWTDTGMWMKKVDGKVAFCVEHGVDLDMSGSSYNPSTYSDDKKDQLAKIAYYGYYQNPTNRNYAVTQMIIWETLGDSLLTTPNKTYQSEKKAILDKVAAHDRKPSFNGKQITLAVGDSITLTDTNGWLAAFAQQTASTANLKITKSGNKLTLTATAQSKESGKVAYAIAKAADVGTSFVYTKGSQQKLVNFKLSSNGEFSLPIKVNLNGNVKAKKIDADTNKTLPGAKLQFEYNGTTKEVTTGADGYAALNGIKAGTKIKISEVTAPNGYVNKGELKEVTIEPGKTVEVVLGNKEQLGNVTLAKIGREFGSDMFNAYYSLNGAVYGIYTSTGTRVGAITTDGNGKGT…
BP071_01279	23262	26912	+	Levanase	Prokka_01294	MEMDEKKHYKMYKSKSVWVFACLSTCLIVSFFNDGQNVSAATSASSTQISQTNTGSQPNNETTGETAQSSVNSTATASSSSVADLPSSSDSKSSIGSTISQPAVDKKETSKSDTADNDLIKSVTTSDSDKALPTSKTTLPTSNEQVQSSVGQSQTDQPASSATIATNAVTSDVSQNEQYNEPYRNQYHYSSSQNWINDPNGLFYDSKTGLYNLYYQYNPEGNQWGNMSWGHAVSKDLINWTQEDVAIPMLQNQGWEDFTYTNTTGSLKDKGEVRYVGVPTTNWGDADGKKAIFSGSIVVDTNNVSGLGKDAILAFYTADYQIATRKNDGAEDGWGTWIGLTEIQEQHLAYSLDGGKTFIQYSKDGNAANPQAIIPTSMNQGGDAANFRDPSVVYDAVNK…
BP071_02540	26026	27585	-	Fimbrial subunit type 1, spaD	Prokka_02565	MNATIKKIGHGLLAALMLMSVLLPLLGAGRTVHAAESQVAFTLHKIEQTADEQIQNTGHDLGLTGRTPVVGAKFKVFNVTDAFYQLLETHDKETAAAMMSQNLGNYANLQDPNAPEITTGQDGLAVFNQLPAKTGGRHSVYAFSETWTPQPYQKAADMIVSLPVRDKNGNDLTNIHLYPKDSVVTKHLDAINGGAVAAKDLHDVAVGDVLTYNIQFQIPHDIGAMADNQSGVFKYNQFEVLDYMTKAGLTFKELTAVTVDGQNILNDLTGKIALMTSNDAAWQTAHGNYPFGFKLDFLGGSDANAVRNLLTKYAGKRVTVGYTGIVNEKMVPDQKIGNTAVVSFDPDTKITVNGPEIQTGGMKFFKYETGSDDKSLAGAKFIIQRQTGNTTEYAVLEGV…
BP071_02541	27582	28904	-	putative outer membrane protein, spaE	Prokka_02566	MRLRLLWWVIPLLLLVGTLLGLQPVSAAENTAEIVLHKRIYRDVRQPEDVWYDNDGQIIDPENPDKAGYKLLSKTSGLNGANFEVYDASSLLKSDMTPDDVQALIEKYQNMTRKQALKFARANLQLAGQGNKGLGLINTTTDKNLGEDGIGRVTVDTGQGSFEKAYLLIETALDFSTDLNVDMERKSSPMLIVFPVKDPTSGDPMSTVHLYPKNVGYVRDPYFFKFGVHPDGTSRRLAGAIFAIYRIVDGQKLYLDLSPATDLKNKWVASTDALHDDRVNKFVSDKDGLVNTGERFLSAGTYYFEELQSVPGYELDEKSRAIKIEIPDSWLDDDDNYRYVLIDGQPMKENIGGIVTPEMISIGNPRVYNYTDRSSTSSESDPTPPTGQSDQSDKPTGAG…
Lactobacillus plantarum BP06	20
locus_tag	start	stop	direction	product	Prokka_locus_tag	translation
BP06_02227	3005	6343	+	Coagulation factor V light chain	Prokka_02268	MIKPRVLTTLLVCSAILTTTVTPAVAAVTPMATPSEQVAEPVASPAVPTATLSLAVQNQQLVDLIGQTQWQNYGQPAVTKDPEFNDQVLNLDGKSAFYTTFTDQQFAKLQNGMAIEAYFKYDPAADANGEHEIFSSQQGGGLGLGVQNNQVVFFAHDGSGYKTPKGTLHKGQWVHAVGVIDKNKTASLYLDGQLVQQVAMPGDLKLAQGTKDFVLGGDAVPGSHVQSMMTGQIRQARLYDQTLTSQQVSQLNVEAQVGKQPVAPVPVDQTIATKLVGPKRIASGHIYGLNVHARQIKATGAAPITMDVVYDAAKFDYVGAERLLQGGKTQIQLIAPGRIRLTTTANLSKAEFKMYAQTRLAHLNLKAKAAGETQIKFEQLTKDTTIELGPAQTVEIQGK…
BP06_02274	56304	57563	+	LPXTG cell wall anchor domain protein	Prokka_02315	MSKALKIVMGITMLTGGIMAQKMTVHAAESNTRTGQAVRMNGTVSLASQVENNPAVKAAHYQVTQAVQALTMATTAVKTAMSDLQAAQTTLDAANKTLAKNQKIQTHMGVLKQAATDRHVKATKALDEQLATKKTSQTAVTTAQAAVTKSQAAVQVAQSNFDKDNSAANKVTLQTTQAKLETVQETLTAAQANLDKTNEHVMMAEEELANAKIEVSGTSRDFQMAQRDYDIVQPQAAVNQAKAAVTAKLQRVAGTQDQVVTAQRELSQAQAGLTTVRARTLATLTAAAEKPMTEKPVGERPVVSHSTGTSTSTNQSAAPQATPAKPTLNQSSSASVPTAQRVVTTQPRQATTVLRTTTSPAMAKPVTQQTVPTTATKTATLPQTGEQTNRVLTVLGFVL…
BP06_00685	697692	698063	+	hypothetical protein	Prokka_00706	MAKFRRLVLLSLSLGLALAGGCRSPDALAATPTDTSVTLTDWQAGTDLTNFQHPRPYQYLAVPNIIATANQQASTQTPSSAAIRPDKSVLPQTNEARQLLVWLGLLTAVLAGWLVWLMQRRRE
BP06_02173	67130	67555	+	hypothetical protein	Prokka_02214	MPNKWWRLILGVMLVLSWAIPVRAATHGRTEISVGFYETKYSADRIIPARVIPDGGHPYVIRPADPGTQGQRNQSERKPIRRQLIIDGWLRGQSRNGQQLPQTSERLVIGSILGGMGLLASVLAGALYRILKRQDGGERNA
BP06_02475	30274	33048	+	Internalin-J	Prokka_02518	MSKDNQKMTGDSVYRVKMYKDGKRWVYAGATTLALAAGLVFANVNASADTAASSDATTEQVSSAASSAATSSTATSSAATDASSASSTASSTATSTSSTASSTATTSSSAASSTASSAATSTTSAASSSAATVSATTPASSDATSTSTATVAATAAKASVATPASAAATATTTATTTAATTAPTVTAPASEAANQTAAGSVDAGTLTSATQSGGSGNLQDQAQYIQENVDGTNIKVTAGHTYAVAIRLTKSQALDWANASGQVSIAPNGSNSNGTWTAVEYATESGKEYSYAAGASTATVDITKLTDADSYVTVLYTFKANDDATTGSRAAYLEFTGTTSVNKLSTNTNNTDANQQIEAWSYATQVMDTSVAAGTVVVHYVDENGNKIADDTTVQGDVD…
BP06_02178	72087	76160	+	Accumulation-associated protein	Prokka_02219	MRYTRGKWRVTNPKVWLFSSVLILGWRIVPTVAQASEAETVTMSSHSVQLETDSQDQLTEVARISKTAVTRDRHSVTAQSSKSADRTSSEQSATTGTVEAVSPTTSEAQQRSTQQDKTAVEQQASDSTAASAGASTNQASAATSSDQAPAANSTGTHHAIDMASSASALGADSGAHSESLSEAQRSGGQGKTIDSDLSGTVHSQSSVSTVTTATPVNSNSSRAVAATDQMSSRVEKRALNKTNVTKSINIPVATKQPSKQRTVTASSFLTTAKNLADKNYLDQYAKQHGQAALIALIQDWLSTYRIIALTGITIVNSSFDGSVATISGGLHVINTGATIRSGQDDEWETIINGGLSVTNNTITFTTTNGLVDRPVANQDMDFTKPRPTGNGAIKGLPSV…
BP06_02132	17951	24049	+	KxYKxGKxW signal peptide	Prokka_02173	MQRRRLQRAQLTEKRTYKMYKKGRLWLIAGLSTFTLGASLLPMMGRADTTSTTAEQQGTGTETTGNQVTLASKSVGSSSMANDGEEKTNNSQVETSSEASNVTASTEAKSTESTTQTVVDSTVTSTATETTRANGATNQTSKMSIVDTTSNNTEQNQAVGGTTDSTASTATIEDQAKAANRATTDGKINTATVATKTTTTASYATADISTNTIRGAQKLARATVATVATVNSATKTYDGKIDTPNRYTITLTDGTKAPSDWAVTSTANVYTVTDLTDVDTSKFGSSVGTYILALSTAGITKLAEANSSADITAANVATGTLTIKQAPVPTAIITIGSASIDYGDAKPSTYTITVPSQYAVPSTWTLASSATDGTTNTYTIASSSGDVMVPTATQSGTYQ…
BP06_02122	116	3700	-	Internalin-J	Prokka_02163	MNKRKIITNNPPKWHLITGIAATILAGIILTNQDAFAATDSTTAPTTTAPTVHQTAPTNPLSGSQVTLTSTTGSSATGSATTSSPVATSTAAMPVKSTATSGSLMSAMASSSATSGHAAEPSSSVTEAASTNNLIPTSAAMASSATTKYPTDTTATPNASSSPTSAESSTPNKTMNTIQQIDGSSVTHSTTPASSASILIPTSVASMTTTKTASAAAPDVTNSTAANSTAPTSVTTTDSAAESVPLSTSSETSSEKLAAASTTSTIQISDGSEVIHPMTSAISSSSSAPTSGAKMAASAASAASASVITSAVNSIAASTYSADASAASVESAATPDTSHATVPASTATSAATTFQITSVINSLASSTYSEYAEQANAEAASAATTAEKPATSVGTVVPT…
BP06_02248	25422	25799	+	hypothetical protein	Prokka_02289	MMRWLLIRGLLGLLIGLGPSIGGAAQTVGTSSTQIQFYTSRSADKQTPTTVQQIPQGDVVYATKAVKAAPNRFVGQWQQVLATGRLPQTGVQANHYYQWLGFLTLMALLLGWQVLKLMRERGANT
BP06_01403	661170	664853	+	hypothetical protein	Prokka_01429	MYTENTGKHHRNGLPVWLLPLLVVISFWGVSQNIMVVDASSSVTVLPGNGGTLPLVNQLVIKQNDTALQGITNNAGDRGSLTPKDGAQRVLIHKVKDSDTITSTYGTVGTFHGQEVTAKVTISHIKVHDDSHKAPSGMKQTDGAFQIGPGFSSDTTMSNVAQFNVSYEFYYADTHAAVNIQNAFITLSSLDGPVAGTSTGFEYAAYLGAGKIYTVENSIVKQIANPLGGGQLVMAGQTARDASWPYTSSTAATFGVSGTKLEFIYGTTRVNSGNSWLQPVYNVSTITLGTPAIATPTLSATQSATDKQNRTLTYDLQQKVNVLDQDLMTKYKDWSENITIPVNAKYAKGEVVNDAGQALPSTAYQVSYDEKTHQVKWHLTDAGIKSLPFKGETYHFKAQ…
BP06_01860	7344	10337	+	IgA FC receptor	Prokka_01893	MKKWGITINYRESEVKCYKMYKSGKMWLFASASLLLLNTQLLTAHADEPTSASTSETSVVATNGVSIQNQGSSNQTLASSVSKTDNVVVANDENASITNQTVIDAQPATNDEPQSAASTAALNGTSGAPNSEVAADSMAAVNGLNTVAPATNSYEASRTDDLFSNAAESTVSEQQPEASEQLLLDTADASERKPAADLQHVEQHQLVDDLKVESQHVDTRAVTRADEDEMSGNFGVDWHFDASTGTLTLNGGTLNNSYGDNPWRRKSWAPMIKCIVIADKIVAGTNMNSLFANLDSVTRYEGLEKIDTSAVTNMQSLFKENTSLERLDLSAWQVGNVTTMVNMFMGNFMGTELKYLNLSGWDTHNVANMQNMFQFNGQLRTIDGLTDWDTRSVTTMANM…
BP06_02037	49645	52350	+	KxYKxGKxW signal peptide	Prokka_02071	MKRNSQQSTTVDHYKMFKDGKHWVYAGITIAGLGSTLMLTTNALAATATPVSATTTSAANAPASVASQLSQAAGATATESTTTSSMTTGEDSNTTSNTDSSATTDTNQITTSTNATETSATEQATSAASATDQASEVANSASGTVTSQTTSATNSTAANTISGNEQAASSATSDATQVTDMVTATTKSTTDSAIDSTDDTSTNTNSTAAATPTSVATTSAASAATSDSGHGLIYETNDTTGNQKSTVTITQSGPYSVTWKKVTTSDKTDTTTVTLDASDIVAVVNTIKDLANQAATPSGKEQLAAAKAKLTTILDELKELPTDIASTIVGNVLYPIVFTGTGSEALSNLRTEMNQHRYDISNTWTGLDPVAYAADRAAAEEYYPTTVTWWDNVTKETWT…
BP06_01785	290756	293260	+	ATPase involved in DNA repair	Prokka_01817	MNKKLLYTSITTAALFVGTQLGVNNAQADTATDNSDTTNQTSATQGSAQTATNEKLATVKPTSQQQYQANVQTAKGNVATAQNQVNTTQTKVATAQGQVTNQSQLVAIGQSQYDAGKAQVDRAQQTLDANNQVLAEAENKVDAAKSQMAAAETQIPADQQQIAANKVAIANQPATEKKAQTAKDAADTALTQAKTEQATAQSDADAASAVTAAKQATVDQASAAQQKAATQANQAKVAVASAQDAVNKNTQAINSAKTAIQNTTSQINANNQAVSTAQAKVTAAQAALAAAERPTTTTESQNKYDAAEFPQSQLTGAETVSVAYPSNGKYVPNADKINQYMFEYINQLRALNGQPALKQTATLQNNAIARAAAQVDGGLDHTGSSYAENLTQVYPQWFM…
BP06_00539	548692	555345	-	KxYKxGKxW signal peptide	Prokka_00559	MRNRLNKLGLESKSHYKLYKSGRRWVAASITVFSVGIGLTFSQVEQVKAATGTGVDTADNSASVSSDMAEPSNAVVLKSASTATVTKTATQDAKAATDVTAATQDTKATTDSTGATSASSNRQSTAATKPAAEVGTASSRADSSASISSTDGASASAPSVTSKSTDTEATSASVTKTATTSADTDVLNTETTSSSVANDLTDATTASQTRTETGKTASIPTAEAPTITTAVTSRALPLTGALASRSANTPVTKSTVQAVSAITSEAETKPTVSLVTTGTVSMDYGEASLADLESHISSPDETPANDVAYYIQDAAGNYLEDVNGNKVNLLYALFLDSADVNDYVDVVYTDEHGQVTKYSGDTDFSTLDQIGSYSVTINAAGKAGMSRVMQDYNAYDTST…
BP06_02286	68896	71397	+	KxYKxGKxW signal peptide	Prokka_02327	MERKRTNFKMYKIGRRWAFACAVILTMGTTTLVARADDGTTATGTDTASTSSSTTKSVTAKTQTLKTTATTEADVTNQNQPVLDTDGSNSKTAAGTVAGTKAATDTDTNATTNLDETTSANTETGSDTTAGSKTAKETNATTGSESTKETSTTTDSATATAARTTTSSNKGATTDSATSNDTAATVAKTTDASAKTTGTTTSDSATQQTATTKDQSTTIATPQTAAVALSQAVTQANDAVADGGNVTDDYPDLHNMLGVSSQFHIFAREAELHAHTNGNVAVQNLVGNVNFGTNIIEELLDKDISYIQNISNIAGSSFVSAGETRSNKVIFGENIEIDVSNPNRPMVNGVYIDHLLASEVYQDKDGNVYIDFDKEFAKLEQLSASLSEASANATYTSDS…
BP06_01861	10360	13479	+	bacterial surface protein 26-residue repeat	Prokka_01894	MEQVKKRYKMYKSGKAWLFAGITLVTLNMNVVTGRADESTHVEALTEPAVATLSEGNAEQQSPVTDAMDESAMSELVTEAQPIKVQAAEEQYTDEIVNQSDDEHANSDQVSVPVTDQVDSETPVPSDEHTATLDTHPNQSTTDDSEQPVSADEQSQDIDTDSTAKVLSSQHKTETINERGSGDLAGVIRNPERPHLTDGYRNDDMEDDDSMAGIWGAGYNADGIKWHFDADSGVLVLDGGDIYDCYGDSPWQSKSWVLQIVKVVISKPIRIIGDSGGFFENLTNVEHYEGFEKIDVSSATDLRYFFSENTHVKELDLSSWQVGNVTDMSYLFFNSPGTSQLTTINISGWDTRRVSEADYMFGPNEKLTRIIGIENLNFESLKEAGGLFIKTGLSELDLS…
BP06_01801	307649	311422	-	Internalin-J	Prokka_01833	MKPNNVNNQNKRHQSRWVITSATAMILTTLTIASQAAAADDTVTTTTNEPTNSQLNTNTQVNATQVNLKADTSTSVSTIKSDQSAVAATSPTTSTGSPSEHSSSVNTNPQQQSANPASQSQATTTSESTPTTDIKHPTQTAPAQTTSASTTEPTTESNTESATDSQAKATTTDNQASKQPSQQAATAPSNSTTTGVNTQSTTSSASTNDKIITSANQEKLVLKTNQPAVRATSRTASENINDWMPNTLLQQEVLSQLRKQNPDRTWNSAADITKADMLLLTTYYGKDTYIDGKTSYSLEGLQYATNLTTVWLNNNLNAPSGSYYSDVTDISPLANLQKLQVVNIQQNRITDISPLANLKNLTEVDAAYNHISDFSPLKGFKNLKGTFSNQFITLPPAYI…
BP06_01679	173819	181765	+	bacterial surface protein 26-residue repeat	Prokka_01710	MNRFITSKQHYKMYKKGRFWVFAGITVATFTLNPLISRADTETTTAATAATTTAGASSSSNSQVLRTTTTSTTGATTQSSATAINAATTNTSAQKKQAVSGTTTDSKTEQPVTAVGENENATSNLSTSDSASASSQAKTGSGDSLDQTSNSSVSVASSSQKVTTQNSDYQNDQGTGSESGIQSNVTDTVVADESLQTNRSSVASPSTSTMASISDSDSKDSNETEKVVDSETSPIAVTATTNTITTTNDKVQLNRALLARAATPATVVSTGTLGTSAWQYTDDGVLTIHAGDWTGVGDVSDVPGDFGSELTKVVIDGPINAGTDTSYMFRYNPNLASIDGLENLDTSKVTDFSMMFMGTKIADFSGLAHWNVSSGTSFDSMFASDSRVQSYDLSQWQLN…
BP06_01244	493977	497033	+	Accumulation-associated protein	Prokka_01270	MRLIDFKTWIMGTAAMLTLIVTNQTVSAADTATTATETTQTSGSSTLANQVVLRQTTSSSSSSSSSSSSSTKASATGAATETATSKAVTASESSNQSSSTTATSQTTSGVTAAQATTDSTDTTATSRATANAKADQRAASAKANNEQATTQNQQQTTNMYSGVVTSQKDSARTATTTDQATASVATLSRMSRASLRSLAQRATVAVQGLDATDATVTDDDGVTYSATDVLSLYANYIAKYHWSIADDVSVAAGSTATVTLPENVVFTNGTQHIDVQKSDGTVVGTFTAETGSQTGTLTFNDYYATSDRYNRQGDLTFYVTGTSATTGSSTTGINKVGWADSNSLDADGNPTKMIWQVVANINSEKWQQVAIVDQLGLYQTHEGTMTLETGHYTDGAFVK…
BP06_02263	41707	43515	+	Collagen binding domain protein	Prokka_02304	MKLSKRGLFWLLGLVSFAILLLFSQPLGAQAATNYHAKDYTTAASVINGPDFKHADTIQIQYQMSFGDTAFKAGDTVTIDMPANLEPRTVGATFDVTDAETGTVIGTGVVGGDGQVVLTMNSAIEGKTNVKIDVNLGMKYRYDDLGEQDVVFDTQDGQDTSVINMVANEANMSKKGTIDKENGTIKWTLLVDRREITMKNLSIADTIGDHQQMIKGIEVYNGEWSSANTYKRRDKLSDDAYQVNYSDNGFDLKFNDTVSNLVVIDYYTKITDTELIDQNYHFKNKAVMEWGGGTSGGKNSEEANGKVYEKVVNGGSGTGDLSSSSSSNSSSSNNSSDVDSSSDDSSSESSSAVDSSSDDSSSESSSAVDSSSDHSSSESSSAVDSSSDDSSSESSSAVD…
Lactobacillus acidophilus BA05	11
locus_tag	start	stop	direction	product	Prokka_locus_tag	translation
BA05_01599	302581	303888	+	hypothetical protein	Prokka_01625	MKKFLIGIVFGIALFLTQKTNITYAANLSDNFTQILIDNDQNNLLNNSEIAHISVKFNDQKNKFTKDSTMFILLNSNKKDVHVQALNEVKKLIIKDDTGEAYQVGKYIVKNNQVQVIFDKNIEKFENISGQIDFDIQISNETTSNQFIQIEAGEINEKIYVSSRPQVNKNVVTEISGKYNSDKNKIAWEIKINSENKSELQIFNTIENQNIDQDTLKIKIDGNLIKLNKNNIEFNKGLKLKLVGKDIVITYITSASEVSSVLNIVRVIEDNENQNVTSAKVQVNDIVNIDGKFNQTSTNKKQREKKISKFFSNLAKLIIDKKQEKTDQNNDEKSQFELAQSTALANAKSTKHDMVVSSKTPSLDDTFEHNIDDKEVKETINESIPNTKKAHSKKHSANK…
BA05_01424	139511	143641	-	bacterial surface protein 26-residue repeat	Prokka_01449	MLSKNNFNEKLMQMNNQKAHFSIRKLTIGAASVLIGITFMGINGQTVNADEMTGNTQPEAMQVSTDKSTDATTTQQNDSDSSAQKNAAQTVEVPQNSKQDNTGETSQSTTDKKDTQVQKTESSETKADTAQSQVPPAANQTQKSADQNVENTQSPVASNTTQPKTQNDSKYNVADWGGSLNDETHEYTLNKYNGSDKENIYIPNTEDFIKAGKITDIDKVFITKDLIQNITKNGATSIVIDDQGSEDKNKVYAKGDWSNAFAGSTKLKSVDLSHLDTSQVTSMAGAFNGDTGLNDANLSGWNIQNMTNLSSLFYGANNLYNVDMSGWNFINNPNTNSMFSYADYNLKSVNLKNAKNVTDDILRIYARAIKNSNATTADLSDINLSPNVTSLHGLFSNMP…
BA05_00254	280117	281157	-	LPXTG cell wall anchor domain protein	Prokka_00254	MIQYVGENGEVISEDTFVGKDQEKQDVTINYPKGWILSDQEVPTKIQINGGITQIHIKHAKTVVKADDPKTTDDVLPHNTDAHYPDGVKKEDLNKTITRKIIINLPNGEVKTRVQIANFTRDAEVDEATGDIHYLKWRLDKNGLTEYLVPKYQGYKANLEKVNYEIPNVNSHYDDLVIEYVADKLSDDSPTDSHDDVINTNSSLDNFLSEKDREDNNSQYERLNQNDDIFNAPLGKAEVPDKRSDKKTQSYKNHHKVISNANITQFNKYESSKKLITNDRIPNSTEKDKKVNKVENIKLRQKISFKNSTKILPETGENNQYLPWMGILLSMLGLNGLVVRRKKKMK
BA05_00850	140065	143040	-	hypothetical protein	Prokka_00860	MQGIIKWIEDNRLSWDHISDQEKYPGWEDVFDESLKIDRVDPFDHKNPQWQATANKEITITQTVNNGSQQSTQQIKVNYDVVIYIAIDPNMSGWDALFGNYKFIISDVKVSNINKVDPDTNTPKDDFDAVNIPTAPEGFENRVTGTIEGPKFDDYNINNNISLEDKVIKTNLDSIFNTILQKGTDVTFKYDIEQIAVKKPTWVDVIDGDDKKEWNDLFQNVDFTKDQDKDNIWTGTVTLNKDIIQTINGLDQENKQTIHLTKDVTITIQRDGNTNNFKILTVNQSNWTPNDSLESTDISKPGYNHNVSASITGTSSDNFTHKVENGHLSTNLDFSKLENNNNQITINYKVSYSPNFGDIALPPNMDLDDLKPDKDNENIFTGTITTDKVINQTVNGKPA…
BA05_01317	12081	17855	-	C protein alpha-antigen	Prokka_01342	MLSKNNFKERLRKMEPRKERFSIRKFSIGAASVLIGFSFMSMAGNQKVQAATEEEPVVATKNTEQQSKTDGTQSAEEQSSADAGNAQNNKSAKANATTPSNQNATDSKLTQSSAQDLSKDNVNSDSKNASDSTSEVKQNNQAIQPETSKPSREVENNETAKNASASQTTNTLNVNKASETQAKSGSESVTSPNKGLVSENKAKVEVKSSTQPKAAMLSLVQESNPATQTETVTDYSTFLNALRNANTGTINLQNDIDFSNANLKHGPNNGLSGKYERLNNTGIARAITINGNGHELKMGDRYIEFTSANQKNTNSNWDIQLKDLTLQTTSGYGPFWFDNTADEAAKNTITFNGVTTTTDSHEIMWYNGGGASTTHVKFEGNNTINSTLNGNTAAIYAYS…
BA05_00253	271393	279345	-	LPXTG cell wall anchor domain protein	Prokka_00253	MISKNNRIKRMEATSERKQHHGIRTLSVGAVSVLLGTTLWISIPTSTVHADEINIDDNQPKTNLESNESASTDHVEKVIVEQNQSSSEGAQQDINAANDVSAQNDQKSVNKINDEIIKNENVDADIKTNTDNSHAETSYGQTESQEIIENKQKTDVEKNKTQTTDNITPVEQTGNSSENTSTNVTTQSPVDNSTNNDVNVNNSNLADTQAELIDSNTQFYESSPLIDQIGQQGKTTVNSSNNTSSKLNIDDLSPDLSDEVLKANLTQGNQILLNQSNSSDTMAGKNADPTKQLEAMARTATLVAASPNADNYTTVNNYNDLQRAVSNYSVSGVNIDGDIYVFGNLTINRAFTIKGTNNAKLNLNQNAIINNSTLTLEDITVNGSIMGNGTVNIKGDVIS…
BA05_01316	6856	11637	-	C protein alpha-antigen	Prokka_01341	MGTGQSKSVKADSVQDDMITQTDEDEALSDEVKIDTTDTSTEEVSNPATDTSTEEVNGPSSDSLTVVDPTMETQSPVEDTITTEPDNSAVNDTNHSTADTSEVETNTSTTDNVAAETTNTAASTTTNADDSVNAADTSTMTVVKTTEEKSDENDQTKEAVDKLTVGATKAKALAAAAEGQTVSVTDYQTFLDALRNKDVSTIDFANDIDFSDALFKRGLINYKNVILNESTDEDIARAVTINGNGNKLIMSDRYIQFTSRNQKTDGKNWDIELKDLTLQTTSGYGPFWFDNTAKQAAGNTITFNGVNTTADSREIMWYKSGAIYSSTANVVFKGNNVINSTLKGDTAAIYAYSVKAEEGSTTTFNVIDESPANSGYDRAVIVIPDNKNSGNVTVAKGAT…
BA05_01471	178807	180123	-	putative bacteriocin transport accessoryprotein	Prokka_01496	MNKKNVSMLMLSPAILLMMNSTIVHADKGSTSHEISSKVVSKTKNDDKNVPESEQETSSNNEIDQSQDKQEKEEQAIPEDQNDQSQNTNNQDPNDASEEDDEDEVSVEDYENNVKDFHRVKMQEVKDLLAEKNNQEHLMYIGRPTCYYCRQFSPDLKDFNEIVKGKLLYFNIDDEEGAHDYAFKVIGIPGTPTTMRFMNGKLISAWIGGEKTGQELHDFLYSDTANKLVEQVVIKNQSNDTATQADNDVVASESDKTPEVTVEENNQAQSNNDVAITNFAENSVFENAKNVASSTADLTQVATGDQDDVAPKAETKNKTVKKPIKHKIVANKVKKQAKLHKTNIIIPMSAKKREDVKENNQYDTVKVHGTSPNAIKDKQARITMLKELENDTSDTISTV…
BA05_01334	36793	40317	-	MucBP domain protein	Prokka_01359	MVHEKKKMRKNHKKITHKGKKITTGAASVLLGAGIVVGANARPVKATSSREDEITEVDTINVISSETEKADVEQRTDTTETVETEGNVDNTNTEVSVPIDETINTEAQAANNTTQVESTVEDTTQEETTETQQNPSVDNQEPVLSDPPSVESPEDSATEVTTTKTTDEVKNAADEANKENKDKLDAEINKAEDNGHTVTQDGDKVYKADATNIDKIIEDLNQFTADQITDIETKLAKYKEELEAYKADQVRYEAELKNYQTAKDAYVKKLEEWGLYKPGDIDPSDISQSLILGEEKNSKVEVLNKGSVVDEGTGSILNGLLNHFYTIDEKFDGEFLKLQYTNLENITYMGKNIDSIQIIFSGWNPNYKGKNADKRTSGIYFSDKLTDGFFYVNSDGVTM…
BA05_00738	12656	23209	+	Extracellular matrix-binding protein ebh	Prokka_00747	MVSKKNIKMIEEKSRDEKQRFSIRKLSVGAASVLIGLAFTVYGGQTVQADTTEASQVTTAQENNEETGNEKSENTVLDNSNDIENSATTASKTPSSSVEEKAPSITIDASSSLKNKNDNIEVKDDNAKVNKTMQSSSVDKANNVTSNEKTESQQAVNTKEDNPTKSEDTKKVNSTAINVGSNENTEVASAQQTNNFEVDKGTTFATNEKTEANSTNVSENVDSIEVPSNKLTTDTLNISKKTVSANVTNAVYTMKTVTSNAANDVNKNKLRSTTMILAAEVEDPNAVTVSDAKGFINAIQNGTATTINVAKDLNLAEQTDKEYTEITIKNKRNIVIQSDNPEEKRTIDFSGYSFDMDTQNSVTFKDLNIYARSYWGLVYNAGGYTFDNVNFTGSQLIYT…
BA05_01391	101440	105066	-	gram-positive signal peptide, YSIRK family	Prokka_01416	MDKKEVKNRFSFRKLSTGLATVFLGSIFFWTNGQTVQADSVEPASEQAVQNVDSQVQADNTVSENTVNEENGSTSETTTEVKTEMPSVDTTSQAKDAVETSDNKKVELPQGEADKQVPQKLEVNKSNQAAETTDKDTKQNATSATPAQLNENTAPVVVKAKSEGKEVVKATDPTDYPTEVGQIIDQDKYIYQILSLNDRSGRPSDSKLVLTTNRNDHNDKNIYAYVVDRNNRRVSQSVTVGVDQHTIISVNGRGYQISNTGGSNVIVDGKEVPTQNTSTVTSGNGTTSPIYGLGNTTRGDYSAIGEIPPVYTENSVIKYYYRDENGNLKEAESSDQYPNVNVSGLTGQEFVIPNVDQYKRVIKGRYLNSDNLPTGDFTGTISQFGEGKYYKKVYYDYGT…
Streptococcus thermophilus BT01	1
locus_tag	start	stop	direction	product	Prokka_locus_tag	translation
BT012_00013	12053	14593	+	5'-nucleotidase	Prokka_00013	MKTDRYVTQSAVVLGLFALLTVPQVVGHADEATAPVPTTSTETVTDSGATIVSGQETSGTAVQGGTETVSATPTPVATNASVEASSSSSTAQASQEASAILTNANQVTPAVPVQPETVTEPAHEGQAVDMQILSTTDIHTNLVNYDYYQDKPSQAVGLSKTAVLIKKARETNPNTVLVDSGDTIQGTPFGTYKALIDPVAQGETHPMYKAFEMLGYDAETLGNHEFNYGLEFLDRMVKTARINIINANVRNAQTGDYYYNPYKIVNKTFTDTDGKQVTLKIGITGVLPTQILVWDKANLEGKVTVDDPMEAVKTIVPQMKAAGADFILVAAHSGIGDNEYTKNEENEGYQIAGIEGVDAVATGHSHADFPNGDGTSFYAKYPGVDDVNGLINGKPVVMA…
Bifidobacterium breve BB02	5
locus_tag	start	stop	direction	product	Prokka_locus_tag	translation
BB02_00461	150591	152429	+	putative outer membrane protein	Prokka_00483	MNTIFKRVISGAAALGIAVSGLAIGVSTAYAADPTTGSITINKSDAGQVDHSFDGWHLASLTNVTKDSTNKINGFLIDTDDNMVRTIVAAMTSDQKVAYEKDANYYSTDNAVANPMGYLVEKVFKDKSGKALSELTSPWGGDSSALRAFAESLSKELAKAGAPTADKTGDSALKTGENKELKQGLWFLKDVTTTDDTKGTNSIPIITPTTFDGADSWGTVTLKNTTPTIDKKLVDSKDDGTYTPNTQPDYAVGDDVYYELTSTVPVYTGYDIDSTMMDATKTRIFKINDTASKALTVSAETVIESVKLTPAQGTAVTLVKDKDYTVTVAGYGDVNTPNTDAYKGGHVTTIDLGKYVNKAEGSKSATDGILEGATVTVIVKAKLNKDALISKPGNLQKNP…
BB02_01917	7173	10901	+	T surface-antigen of pili	Prokka_01979	MKRIAEWFAAVGAAASKSGKRLVAVVAAVAMLGGVASVSATAMADDQSAADTQQPTAQTETPANTDSKDAGTDTGSKDDSTKADATKSDDAASADTDAAASELTKQTAPAPTSTLNTQAAEATNGSCVYAGNVASGLNNVCWLDMTNFTADKDQLQPMSVKLSDSLTMKFNIKYTGGRTLRSAAVPTWNKAAFGHYGYAGFPEGTKPALYQITGSYNTESTVELTDIKIVNADGSEITGNYSFMMADAESTNNNESISFTSSNEIEQVAQFPQQGDADYKNYAFGDQTFSADHKTVTGGGVRTGANPGIYLYKTKSPDTVSVTMRVNVRREIQAAIFGVLFSNAETTGTTNNASDTFAGKVESQTYGSEQTGGVTGSNSATSKVVNMLSDTDTSEQVKF…
BB02_01918	11109	12656	+	putative outer membrane protein	Prokka_01980	MKLRKLFAGVAAAATLLGGMAFGATAANAADTASITLSGKTVKGTVYTAYKIGSYDTVSAKVENDKLASVGVTTDQAWKTDAENVLGATVTNTPEYKGYGDPLAYVAGTTGYYTNTPATLPNASATMESFVQSLAGKLDGKTAVDPSQTVANDNDEVVFSGLDEGLYLIVSKTDTEPATDAGSPLAIVGTQVTVNGTAYTKLGANNQTLGKAVVKPSTPQKPSKSASDLNPYVGATITYTLEGTVPAKANSFKFVDTPSAGLTVKLDTLKVNVQGETDPLANTEYTVDPASGDFNTSAAKPSFTIALNNATKYQGKHIVVKYNALVNKKANVNGTNNDVRFDNSNQTTTTTITPQLNTVTFTKKGVDADTNALKGVVFQIVADTNNATPLPDGTATEAT…
BB02_01877	49690	54498	-	Cell surface antigen II	Prokka_01937	MNFGRKMMKAGVAAVAAIATLGAGGVVASTAFAGGGGGNQPGAGGNMDVLQFWQYKDDASGAWGPATSLDSVRAAMNNAGVALQGGGVTKAQAALDQARTECETGFRQRHPGEGDGDCRVVAVGAVPYISGRSFIYDGTGYYSPSLPGGWYDNWNKYVAPRTYQYGSTVYLTSNPFDDDPSNSVDAIMRRNVGASSKPSIVVVVLDKYQPAPPSYHLGISTQAAEMSGQAGDTKDASDVITLSSDGSKTENVNGTATLHWRGIDGTEKTVAKQFTASNKGSATVSASFKDMDASWESWPAGKRWWDVDVAKQGDMAEAVSHKGENDGKESGEKTTTPPEKWLTNGAGDTVRDGNDSIASGSLYTAHIKAHSNASGKFWIYDTIDTRDVVIGGTEQDDVS…
BB02_01879	55903	62886	-	streptococcal pilin isopeptide linkage domainprotein	Prokka_01939	MNFGRKTMKPGLRKVAALILASAMLFGSGASAVSAAYADDTTMGTSTRIQAEPDVKTTTGGDEAATKPDAGSGDEAGTGADKQSDTGAPAQSAPQADAGQAAPDVTVHDMLDTDSAAVSRLRLIDRITGTAPFDADNGRGDDKDENNDIVRSYDTVTYDYEYTLTPDSTMDYYRRTRVGFRFELPYPKDKVTFDAEKMGWVDHTPGYEPKLTTETIDGTVTQVYTCYRLLEPTSQSPTVNPGTGSIGLSVAVKGAPHGYRFHPTVKAWPAWDASSPTNTGTHKRAEDTPKDVTVSAKLNLNVRMVNYGNVDRGVFDFSSGAANAPNKTEGKVTGLGLGIALVTEMRWPDRTKGLKGLEAPSGRITYRLRLSNQYSDDTKTGTKHPMERRWQPLLYDYGH…
Bifidobacterium animalis subsp. lactis BL03	2
locus_tag	start	stop	direction	product	Prokka_locus_tag	translation
BL03_01411	87153	89792	-	von Willebrand factor type A domain protein, spa	Prokka_01463	MKRLKHRSAQSGASDHAGRKGARPLRSVLASLCAVAMSLGMASASVAAFADDRQPAATADPQAATASAGNVDAPQHTKRISKNDDGTYTLSMDVTGKSDESTEQQVVPLDIALVLDVSGSMNELSGKLVYNEVELLSMNPISTYYVEKDGSYQAVRCSAISWGRCTTWQDQDSAGQKYTVTYNWIGGPSASVSPDVQFYKSKQSEETRLDALKDAVTYFLDQVEDQNQRINDPGKKVQVALIKYAGKNSDKIGNDTYNEDGYNYNYSQTVHSLAWTPEDLQKEQAAVNSLKAGGATRADFGLQHAVKQLNSGRPGAQKLTVFYSDGSPTSSDGFEAKIANNAIKAAAQLKNDHSQVISIGAMPGADPSGTDNANKFMNYVSSNYPKAQSMSEPHDRVEG…
BL03_01410	85276	86958	-	fimbrial isopeptide formation D2 domain protein, spa	Prokka_01462	MNLKRVFAGVAAAATALGTLAIGAATANAAPLTGSTESITINEALEGQTFQAYQLATFTDATGANGVINDLAMSTPAAANAALKKAINALNDANPAGWTTDVDLTAANVVDNNLALLVTTLSSSQLRVLAKQLAGSGLNSTHEATVAPGATSATITGLQPGWYLVTCTSGAEDAEVAPAIMPSTVAEYTSIAQKPSGTITLGKLNVKMVVPTPHKTIDANDPKVLKVGDTLHYTITSTLPAHDATSTVKYHYIIDTPGLGLTVDNPATGEKNIKVFVNGTQLTDGTDFVVQGFTGADLNGTTITGTEGFPIQGNGKNNIFTVDLTEYATAHPELAGKQVTVTYAATVNSDALDTVSNKVNVGGDDPTDWRGTEEITRAVSQLQLKKVGVEDTDKNGAAG…
Bifidobacterium animalis subsp. lactis BI04	2
locus_tag	start	stop	direction	product	Prokka_locus_tag	translation
BI04_01381	15836	18475	+	von Willebrand factor type A domain protein, spa	Prokka_01432	MKRLKHRSAQSGASDHAGRKGARPLRSVLASLCAVAMSLGMASASVAAFADDRQPAATADPQAATASAGNVDAPQHTKRISKNDDGTYTLSMDVTGKSDESTEQQVVPLDIALVLDVSGSMNELSGKLVYNEVELLSMNPISTYYVEKDGSYQAVRCSAISWGRCTTWQDQDSAGQKYTVTYNWIGGPSASVSPDVQFYKSKQSEETRLDALKDAVTYFLDQVEDQNQRINDPGKKVQVALIKYAGKNSDKIGNDTYNEDGYNYNYSQTVHSLAWTPEDLQKEQAAVNSLKAGGATRADFGLQHAVKQLNSGRPGAQKLTVFYSDGSPTSSDGFEAKIANNAIKAAAQLKNDHSQVISIGAMPGADPSGTDNANKFMNYVSSNYPKAQSMSEPHDRVEG…
BI04_01382	18670	20352	+	fimbrial isopeptide formation D2 domain protein, spa	Prokka_01433	MNLKRVFAGVAAAATALGTLAIGAATANAAPLTGSTESITINEALEGQTFQAYQLATFTDATGANGVINDLAMSTPAAANAALKKAINALNDANPAGWTTDVDLTAANVVDNNLALLVTTLSSSQLRVLAKQLAGSGLNSTHEATVAPGATSATITGLQPGWYLVTCTSGAEDAEVAPAIMPSTVAEYTSIAQKPSGTITLGKLNVKMVVPTPHKTIDANDPKVLKVGDTLHYTITSTLPAHDATSTVKYHYIIDTPGLGLTVDNPATGEKNIKVFVNGTQLTDGTDFVVQGFTGADLNGTTITGTEGFPIQGNGKNNIFTVDLTEYATAHPELAGKQVTVTYAATVNSDALDTVSNKVNVGGDDPTDWRGTEEITRAVSQLQLKKVGVEDTDKNGAAG…
